# Supplementary material for: Proteomic analyses of age related changes in A.BY/SnJ mouse hearts
Source: PubMed Central journal article supplement (PMC3704963; doi:10.1186/1477-5956-11-29), 2013-07-01
Supplement: 1477-5956-11-29-S3.pdf [file 1477-5956-11-29-S3.pdf]

**Table S3-Proteins displaying changes in 4 months old hearts compared to control mice detected by LC-MS/MS approach**

| Swissprot ID* | Protein Annotation   | Acc.No* | MW      | pI    | Sub-cellular Location                                                              | Peptide Count | Sum of Norm. Spectra |              |              | Sequence Coverage | Fold Change | p-value | Fold Change | p-value | CV†    | CV    | CV     |
|---------------|----------------------|---------|---------|-------|------------------------------------------------------------------------------------|---------------|----------------------|--------------|--------------|-------------------|-------------|---------|-------------|---------|--------|-------|--------|
|               |                      |         |         |       |                                                                                    |               | Day 0                | 4 months     | 6 months     |                   |             |         |             |         |        |       |        |
|               |                      |         |         |       |                                                                                    |               | 4 m vs Day 0         | 4 m vs Day 0 | 6 m vs Day 0 |                   |             |         |             |         |        |       |        |
| BDH_MOUSE     | D-beta-hydroxybut    | Q80XN0  | 38 kDa  | 8.62  | Mitochondrion matrix                                                               | 4             | 2.00                 | 22.88        | 46.72        | 18%               | 12.20       | 0.00    | 23.36       | 0.00    | 0.00   | 35.58 | 111.90 |
| GDIB_MOUSE    | Rab GDP dissociati   | Q61598  | 51 kDa  | 5.93  | Cytoplasm Membrane; Peripheral membrane                                            | 4             | 3.16                 | 11.44        | n.d          | 11%               | 3.86        | 0.01    |             |         | 73.42  | 22.54 | 75.97  |
| ARHL1_MOUSE   | [Protein ADP-ribos   | Q8BGK2  | 40 kDa  | 5.62  |                                                                                    | 3             | 4.58                 | 15.19        | 9.56         | 13%               | 3.54        | 0.04    | 2.09        | 0.24    | 112.66 | 36.35 | 83.32  |
| ODBA_MOUSE    | 2-oxoisovalerate d   | P50136  | 50 kDa  | 6.05  | Mitochondrion matrix                                                               | 3             | 3.16                 | 8.81         | n.d.         | 10%               | 2.97        | 0.03    |             |         | 73.42  | 35.15 | 71.61  |
| IDH3G_MOUSE   | Isocitrate dehydroq  | P70404  | 43 kDa  | 8.66  | Mitochondrion                                                                      | 2             | 7.48                 | 19.31        | 19.55        | 13%               | 2.75        | 0.03    | 2.61        | 0.09    | 74.15  | 30.69 | 67.35  |
| NDUB9_MOUSE   | NADH dehydrogen      | Q9CQJ8  | 22 kDa  | 7.84  | Mitochondrion inner membrane; Peripheral membrane protein                          | 2             | 10.56                | 23.25        | 22.29        | 27%               | 2.35        | 0.08    | 2.11        | 0.09    | 100.92 | 16.76 | 65.87  |
| CD36_MOUSE    | Platelet glycoprote  | Q08857  | 53 kDa  | 8.61  | Membrane                                                                           | 2             | 12.41                | 26.44        | 28.38        | 6%                | 2.27        | 0.03    | 2.29        | 0.01    | 56.93  | 20.44 | 54.01  |
| MYG_MOUSE     | Myoglobin            | P04247  | 17 kDa  | 7.23  |                                                                                    | 9             | 186.77               | 374.06       | 581.01       | 61%               | 2.14        | 0.00    | 3.11        | 0.00    | 35.02  | 6.70  | 44.46  |
| NDUA9_MOUSE   | NADH dehydrogen      | Q9DC69  | 43 kDa  | 9.48  | Mitochondrion matrix                                                               | 3             | 13.76                | 26.44        | 30.75        | 14%               | 2.05        | 0.10    | 2.23        | 0.03    | 80.55  | 20.44 | 57.61  |
| COX6C_MOUSE   | Cytochrome c oxid.   | Q9CPQ1  | 8 kDa   | 10.13 | Mitochondrion inner membrane                                                       | 3             | 9.74                 | 18.56        | 18.20        | 26%               | 2.03        | 0.09    | 1.87        | 0.16    | 77.94  | 16.69 | 55.75  |
| LAMA2_MOUSE   | Laminin subunit al   | Q60675  | 343 kDa | 5.77  | extracellular matrix; basement membrane                                            | 9             | 22.41                | 40.88        | 33.98        | 3%                | 1.95        | 0.05    | 1.52        | 0.38    | 63.26  | 4.20  | 48.15  |
| CPT1B_MOUSE   | Carnitine-O-palmit   | Q924X2  | 88 kDa  | 8.65  | Mitochondrion outer membrane                                                       | 6             | 15.52                | 27.19        | 38.72        | 8%                | 1.87        | 0.05    | 2.49        | 0.00    | 19.92  | 34.56 | 44.59  |
| ACTS_MOUSE    | Actin, alpha skelet  | P68134  | 42 kDa  | 5.23  | Cytoplasm cytoskeleton                                                             | 12            | 509.27               | 814.50       | 1021.78      | 51%               | 1.71        | 0.01    | 2.01        | 0.00    | 20.40  | 17.75 | 33.80  |
| ACS2L_MOUSE   | Acetyl-coenzyme A    | Q99NB1  | 75 kDa  | 5.98  | Mitochondrion matrix                                                               | 6             | 16.54                | 25.50        | 20.81        | 14%               | 1.64        | 0.00    | 1.26        | 0.27    | 19.35  | 0.00  | 29.04  |
| MMSA_MOUSE    | Methylmalonate-si    | Q9EQ20  | 58 kDa  | 7.02  | Mitochondrion                                                                      | 8             | 24.51                | 37.31        | 29.17        | 15%               | 1.62        | 0.03    | 1.19        | 0.49    | 31.32  | 13.57 | 33.14  |
| CPT2_MOUSE    | Carnitine-O-palmit   | P52825  | 74 kDa  | 7.95  | Mitochondrion inner membrane; Peripheral membrane                                  | 6             | 18.99                | 28.13        | 35.91        | 14%               | 1.58        | 0.05    | 1.89        | 0.00    | 7.17   | 28.94 | 32.86  |
| NDUBA_MOUSE   | NADH dehydrogen      | Q9DCS9  | 21 kDa  | 8.36  | Mitochondrion inner membrane; Peripheral membrane                                  | 4             | 35.06                | 51.19        | 42.91        | 32%               | 1.56        | 0.06    | 1.22        | 0.22    | 20.34  | 25.21 | 32.37  |
| MPCP_MOUSE    | Phosphate carrier j  | Q8VEM8  | 40 kDa  | 9.11  | Mitochondrion inner membrane                                                       | 6             | 43.41                | 61.88        | 67.48        | 20%               | 1.52        | 0.01    | 1.55        | 0.00    | 21.02  | 7.35  | 26.32  |
| ETFD_MOUSE    | Electron transfer fl | Q921G7  | 68 kDa  | 6.47  | Mitochondrion inner membrane                                                       | 11            | 48.33                | 67.88        | 67.29        | 20%               | 1.50        | 0.01    | 1.39        | 0.01    | 13.81  | 10.66 | 24.57  |
| CACP_MOUSE    | Carnitine-O-acetyl   | P47934  | 71 kDa  | 8.63  | Endoplasmic reticulum Peroxisome Mitochondrion inner membrane; Peripheral membrane | 6             | 30.44                | 42.19        | 54.56        | 15%               | 1.48        | 0.01    | 1.79        | 0.00    | 6.26   | 13.49 | 23.56  |
| ACOT2_MOUSE   | Acyl-coenzyme A tl   | Q9QYR9  | 50 kDa  | 6.14  | Mitochondrion matrix                                                               | 3             | 11.01                | 14.81        | 11.30        | 7%                | 1.44        | 0.08    | 1.03        | 0.91    | 33.04  | 6.58  | 28.16  |
| NNTM_MOUSE    | NAD(P) transhydro    | Q61941  | 114 kDa | 6.45  | Mitochondrion inner membrane                                                       | 10            | 58.14                | 78.19        | 83.02        | 13%               | 1.43        | 0.03    | 1.43        | 0.04    | 15.67  | 17.06 | 24.75  |
| TERA_MOUSE    | Transitional endop   | Q01853  | 89 kDa  | 5.14  | Cytoplasm, Nucleus                                                                 | 11            | 33.24                | 44.06        | 36.73        | 13%               | 1.41        | 0.10    | 1.10        | 0.60    | 28.10  | 17.55 | 28.04  |
| ODO1_MOUSE    | 2-oxoglutarate def   | Q60597  | 116 kDa | 6.05  | Mitochondrion matrix                                                               | 20            | 119.28               | 155.44       | 162.28       | 26%               | 1.39        | 0.05    | 1.36        | 0.02    | 21.62  | 13.34 | 23.97  |
| HBA_MOUSE     | Hemoglobin subun     | P01942  | 15 kDa  | 8.08  |                                                                                    | 6             | 384.52               | 494.06       | 428.87       | 43%               | 1.37        | 0.08    | 1.12        | 0.59    | 24.48  | 13.17 | 24.42  |
| AT5F1_MOUSE   | ATP synthase subu    | Q9CQQ7  | 29 kDa  | 8.55  | Mitochondrion inner membrane                                                       | 5             | 28.21                | 36.19        | 36.88        | 15%               | 1.37        | 0.02    | 1.31        | 0.05    | 15.54  | 9.71  | 20.57  |
| CMC1_MOUSE    | Calcium-binding m    | Q8BH59  | 75 kDa  | 8.43  | Mitochondrion inner membrane                                                       | 8             | 36.81                | 45.75        | 57.14        | 19%               | 1.33        | 0.05    | 1.55        | 0.01    | 16.68  | 12.78 | 20.35  |
| PEBP1_MOUSE   | Phosphatidylethan    | P70296  | 21 kDa  | 5.19  | Cytoplasm                                                                          | 7             | 52.04                | 63.38        | 48.79        | 64%               | 1.30        | 0.08    | 0.94        | 0.72    | 20.38  | 10.85 | 20.39  |
| HBB1_MOUSE    | Hemoglobin subun     | P02088  | 16 kDa  | 7.26  |                                                                                    | 5             | 201.95               | 237.00       | 236.24       | 39%               | 1.25        | 0.06    | 1.17        | 0.16    | 15.31  | 7.84  | 16.41  |
| PGAM2_MOUSE   | Phosphoglycerate i   | O70250  | 29 kDa  | 8.65  |                                                                                    | 6             | 63.21                | 49.31        | 47.86        | 21%               | 0.83        | 0.06    | 0.76        | 0.01    | 7.83   | 12.20 | 13.00  |
| DESM_MOUSE    | Desmin               | P31001  | 53 kDa  | 5.21  | Cytoplasm                                                                          | 23            | 234.48               | 182.81       | 166.32       | 51%               | 0.83        | 0.03    | 0.71        | 0.00    | 8.11   | 7.64  | 12.16  |

|             |                      |        |         |       |                                                                            |    |        |        |        |      |      |      |      |      |       |       |       |
|-------------|----------------------|--------|---------|-------|----------------------------------------------------------------------------|----|--------|--------|--------|------|------|------|------|------|-------|-------|-------|
| ATPA_MOUSE  | ATP synthase subu    | Q03265 | 60 kDa  | 8.28  | Mitochondrion inner membrane                                               | 22 | 872.14 | 676.88 | 751.09 | 50%  | 0.83 | 0.01 | 0.86 | 0.01 | 6.52  | 6.23  | 11.57 |
| ATPD_MOUSE  | ATP synthase subu    | Q9D3D9 | 18 kDa  | 4.46  | Mitochondrion inner membrane                                               | 2  | 39.39  | 30.38  | 27.66  | 14%  | 0.82 | 0.01 | 0.70 | 0.03 | 3.88  | 8.55  | 11.56 |
| VDAC1_MOUSE | Voltage-dependen     | Q60932 | 32 kDa  | 8.55  | Mitochondrion outer membrane; Cell membrane                                | 8  | 95.84  | 73.88  | 92.00  | 33%  | 0.82 | 0.04 | 0.96 | 0.66 | 10.35 | 2.64  | 13.05 |
| NDUA7_MOUSE | NADH dehydrogen      | Q9Z1P6 | 13 kDa  | 10.17 | Mitochondrion inner membrane; Peripheral membrane protein                  | 3  | 43.82  | 32.63  | 25.87  | 28%  | 0.79 | 0.01 | 0.59 | 0.00 | 7.96  | 1.99  | 13.59 |
| IMMT_MOUSE  | Mitochondrial inne   | Q8CAQ8 | 84 kDa  | 6.18  | Mitochondrion inner membrane                                               | 13 | 97.73  | 72.00  | 81.61  | 17%  | 0.79 | 0.07 | 0.84 | 0.08 | 12.08 | 15.65 | 17.56 |
| NDUA4_MOUSE | NADH dehydrogen      | Q62425 | 9 kDa   | 9.52  | Mitochondrion inner membrane; Peripheral membrane protein                  | 3  | 67.82  | 49.88  | 57.32  | 37%  | 0.78 | 0.05 | 0.85 | 0.10 | 10.65 | 15.35 | 16.99 |
| ATPO_MOUSE  | ATP synthase subu    | Q9DB20 | 23 kDa  | 9.8   | Mitochondrion inner membrane                                               | 7  | 110.04 | 80.06  | 89.64  | 50%  | 0.78 | 0.10 | 0.81 | 0.08 | 15.99 | 15.54 | 19.77 |
| TNNT2_MOUSE | Troponin T, cardiac  | P50752 | 36 kDa  | 4.98  |                                                                            | 6  | 110.80 | 76.69  | 85.96  | 20%  | 0.74 | 0.09 | 0.78 | 0.05 | 17.70 | 18.97 | 23.02 |
| ATP5H_MOUSE | ATP synthase subu    | Q9DCX2 | 19 kDa  | 5.53  | Mitochondrion inner membrane                                               | 11 | 202.24 | 138.38 | 144.11 | 66%  | 0.73 | 0.09 | 0.71 | 0.04 | 20.71 | 8.99  | 23.65 |
| ALDR_MOUSE  | Aldose reductase     | P45376 | 36 kDa  | 6.79  | Cytoplasm                                                                  | 4  | 23.48  | 15.94  | 19.04  | 11%  | 0.72 | 0.03 | 0.81 | 0.09 | 12.95 | 16.17 | 21.13 |
| TAGL_MOUSE  | Transgelin           | P37804 | 23 kDa  | 8.86  | Cytoplasm                                                                  | 2  | 20.22  | 13.69  | 14.79  | 12%  | 0.72 | 0.06 | 0.73 | 0.04 | 18.56 | 12.33 | 23.25 |
| CH60_MOUSE  | 60 kDa heat shock    | P63038 | 61 kDa  | 5.35  | Mitochondrion matrix                                                       | 15 | 159.56 | 107.44 | 109.67 | 33%  | 0.72 | 0.06 | 0.69 | 0.03 | 17.55 | 14.36 | 23.20 |
| EHD4_MOUSE  | EH domain-contain    | Q9EQP2 | 61 kDa  | 6.33  | Early endosome membrane; Peripheral membrane                               | 6  | 28.18  | 18.38  | 21.56  | 9%   | 0.70 | 0.02 | 0.77 | 0.05 | 15.18 | 3.53  | 22.48 |
| CYC_MOUSE   | Cytochrome c, som    | P62897 | 12 kDa  | 9.61  | Mitochondrion matrix                                                       | 5  | 151.65 | 91.69  | 72.90  | 49%  | 0.64 | 0.02 | 0.48 | 0.00 | 18.07 | 1.97  | 27.00 |
| PHB_MOUSE   | Prohibitin           | P67778 | 30 kDa  | 5.57  | Mitochondrion inner membrane                                               | 3  | 24.53  | 14.81  | 13.98  | 10%  | 0.64 | 0.05 | 0.57 | 0.09 | 23.23 | 6.58  | 29.80 |
| ODPB_MOUSE  | Pyruvate dehydrog    | Q9D051 | 39 kDa  | 5.39  | Mitochondrion matrix                                                       | 9  | 126.89 | 73.50  | 95.78  | 34%  | 0.62 | 0.01 | 0.75 | 0.07 | 14.89 | 19.01 | 28.65 |
| ECH1_MOUSE  | Delta(3,5)-Delta(2,  | O35459 | 36 kDa  | 6.01  | Mitochondrion Peroxisome                                                   | 4  | 30.91  | 17.25  | 28.37  | 20%  | 0.60 | 0.07 | 0.92 | 0.66 | 28.91 | 9.96  | 36.25 |
| COQ9_MOUSE  | Ubiquinone biosyn    | Q8K1Z0 | 35 kDa  | 4.93  | Mitochondrion                                                              | 4  | 31.72  | 17.44  | 21.69  | 13%  | 0.59 | 0.09 | 0.68 | 0.12 | 30.33 | 28.18 | 39.20 |
| ANXA5_MOUSE | Annexin A5           | P48036 | 36 kDa  | 4.83  |                                                                            | 5  | 27.45  | 14.81  | 9.64   | 17%  | 0.58 | 0.08 | 0.35 | 0.01 | 32.06 | 6.58  | 39.29 |
| PGK1_MOUSE  | Phosphoglycerate k   | P09411 | 45 kDa  | 8.02  | Cytoplasm                                                                  | 6  | 49.78  | 22.88  | 44.22  | 15%  | 0.49 | 0.03 | 0.89 | 0.57 | 28.12 | 24.75 | 44.09 |
| CO1A2_MOUSE | Collagen alpha-2(I)  | Q01149 | 130 kDa | 10.00 | extracellular matrix                                                       | 4  | 72.45  | 31.50  | 34.44  | 3%   | 0.46 | 0.06 | 0.48 | 0.05 | 35.05 | 27.28 | 50.11 |
| CO1A1_MOUSE | Collagen alpha-1(I)  | P11087 | 138 kDa | 9.28  | extracellular matrix                                                       | 2  | 36.89  | 15.00  | 12.36  | 2%   | 0.43 | 0.01 | 0.34 | 0.00 | 20.74 | 37.00 | 46.07 |
| CX7A1_MOUSE | Cytochrome c oxid    | P56392 | 9 kDa   | 8.71  | Mitochondrion inner membrane                                               | 2  | 33.80  | 12.94  | 32.43  | 29%  | 0.41 | 0.01 | 0.96 | 0.82 | 8.23  | 77.82 | 49.60 |
| GRP78_MOUSE | 78 kDa glucose-reg   | P20029 | 72 kDa  | 5.01  | Endoplasmic reticulum lumen; Melanosome                                    | 7  | 39.94  | 13.69  | 24.67  | 10%  | 0.37 | 0.08 | 0.62 | 0.23 | 48.90 | 12.33 | 66.62 |
| NDUB4_MOUSE | NADH dehydrogen      | Q9CQC7 | 15 kDa  | 9.89  | Mitochondrion inner membrane                                               | 2  | 25.68  | 8.63   | 19.67  | 27%  | 0.36 | 0.01 | 0.77 | 0.13 | 9.41  | 78.26 | 53.12 |
| LMNA_MOUSE  | Lamin-A/C            | P48678 | 74 kDa  | 6.54  | Nucleus Nucleus envelope                                                   | 4  | 41.68  | 12.00  | 22.35  | 4%   | 0.31 | 0.02 | 0.54 | 0.02 | 28.29 | 74.41 | 62.74 |
| PDIA1_MOUSE | Protein disulfide-is | P09103 | 57 kDa  | 4.75  | Endoplasmic reticulum lumen; Melanosome Cell membrane; Peripheral membrane | 2  | 12.11  | 3.19   | 2.00   | 0.06 | 0.28 | 0.02 | 0.17 | 0.00 | 34.50 | 71.32 | 67.91 |
